# Supplementary material
Source: PubMed Central journal article supplement (PMC1820906)
Supplement: plntphys_pp.106.089474_1.pdf [file plntphys_pp.106.089474_1.pdf]

**A**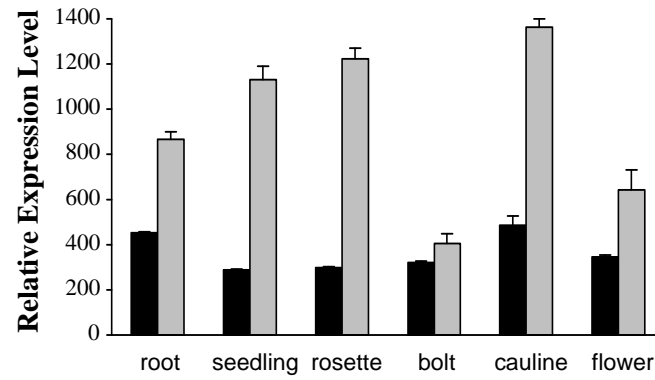**B**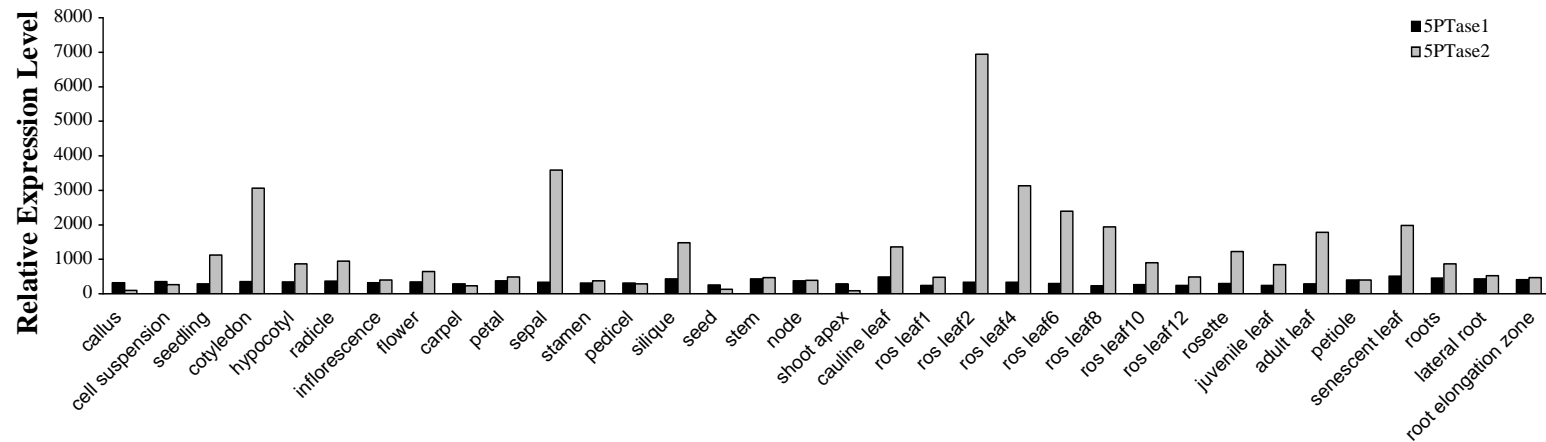

**Supplemental Figure 1 legend.** Genevestigator Expression Analysis of At5PTase1 and At5PTase2. Data from the Genvestigator web site was analyzed and plotted. B. Expression in tissues as compared to Figure 1A. Error bars are standard deviation. B. Expression in other tissues.
